# Supplementary material for: Wide-dynamic-range promoters engineered for cyanobacteria
Source: PubMed Central journal article supplement (PMC3724501; doi:10.1186/1754-1611-7-10), 2013-04-22
Supplement: 1754-1611-7-10-S1.pdf [file 1754-1611-7-10-S1.pdf]

## **Supplementary Data for**

# **Wide-Dynamic-Range Promoters Engineered for Cyanobacteria**

Hsin-Ho Huang, and Peter Lindblad\*

Microbial Chemistry, Department of Chemistry - Ångström Laboratory, Uppsala University, P.O. Box 523, SE-75120, Uppsala, Sweden

\* Corresponding author

Email addresses:

HHH: [hsin-ho.huang@kemi.uu.se](mailto:hsin-ho.huang@kemi.uu.se)

PL: [peter.lindblad@kemi.uu.se](mailto:peter.lindblad@kemi.uu.se)

**Supplementary Table S1.** Primers used in the present study

| Primer           | Sequence, 5'→3'                            | note                 |
|------------------|--------------------------------------------|----------------------|
| XhoI_f_pSB2K3    | TGCTCGAGGCCGCGATTAAATCCAACATGGATGCT        | for all L promoters  |
| R40c10A-6C_G-5C  | GATAGATATAATGCCCACTACTAGTAGCGGCCGCTGCAGTCC | for the L01 promoter |
| R40c10A-6T_G-5C  | GATAGATATAATGTCCACTACTAGTAGCGGCCGCTGCAGTCC | for the L02 promoter |
| R40c10A-6G_G-5C  | GATAGATATAATGGCCACTACTAGTAGCGGCCGCTGCAGTCC | for the L03 promoter |
| R40c10G-5C       | GATAGATATAATGACCACTACTAGTAGCGGCCGCTGCAGTCC | for the L04 promoter |
| R40c10A-6C_G-5T  | GATAGATATAATGCTCACTACTAGTAGCGGCCGCTGCAGTCC | for the L05 promoter |
| R40c10A-6T_G-5T  | GATAGATATAATGTTCACTACTAGTAGCGGCCGCTGCAGTCC | for the L06 promoter |
| R40c10A-6G_G-5T  | GATAGATATAATGGTCACTACTAGTAGCGGCCGCTGCAGTCC | for the L07 promoter |
| R40c10G-5T       | GATAGATATAATGATCACTACTAGTAGCGGCCGCTGCAGTCC | for the L08 promoter |
| R40c10A-6C       | GATAGATATAATGCGCACTACTAGTAGCGGCCGCTGCAGTCC | for the L09 promoter |
| R40c10A-6T       | GATAGATATAATGTGCACTACTAGTAGCGGCCGCTGCAGTCC | for the L10 promoter |
| R40c10A-6G       | GATAGATATAATGGGCACTACTAGTAGCGGCCGCTGCAGTCC | for the L11 promoter |
| R40c10           | GATAGATATAATGAGCACTACTAGTAGCGGCCGCTGCAGTCC | for the L12 promoter |
| R40c10A-6C_G-5A  | GATAGATATAATGCACACTACTAGTAGCGGCCGCTGCAGTCC | for the L13 promoter |
| R40c10A-6T_G-5A  | GATAGATATAATGTACACTACTAGTAGCGGCCGCTGCAGTCC | for the L14 promoter |
| R40c10A-6G_G-5A  | GATAGATATAATGGACACTACTAGTAGCGGCCGCTGCAGTCC | for the L15 promoter |
| R40c10G-5A       | GATAGATATAATGAACACTACTAGTAGCGGCCGCTGCAGTCC | for the L16 promoter |
| R40c10_GGGA      | GATAGATATAATGGGAGCTACTAGTAGCGGCCGCTGCAGTCC | for the L21 promoter |
| R40_GGGA         | TGGGAGCTACTAGTAGCGGCCGCTGCAGTCC            | for the L22 promoter |
| R40c10withTrcDIS | GATAGATATAATGTGTGGTACTAGTAGCGGCCGCTGCAGTCC | for the L31 promoter |
| dtetLVA_F        | TGTGAAAGTGGGTCCTAATAAAAACGACGAAAACACTAC    | LVA tag removal      |
| dtetLVA_R        | GTAGTTTTCGTCGTTTTATTAGGACCCACTTTCACA       | LVA tag removal      |
| GSP1             | AGGGTGTCGCCCT                              | 5'-RACE              |
| GSP2             | CGAACTTCACCTCGGCGCGGGTC                    | 5'-RACE              |
| nestGSP          | TTGTAGTTGCCGTCGTCCTTGAAGAAGAT              | 5'-RACE              |

**Supplementary Table S2.** The induction fold of L03 promoter in cells of the cyanobacterium *Synechocystis* PCC6803 under different growth conditions

| Time (h) | aTc (ng/mL)     | light-activated darkness |               | red light     |           | white light |           |
|----------|-----------------|--------------------------|---------------|---------------|-----------|-------------|-----------|
|          |                 | 0 mM Glc                 | 5 mM Glc      | 0 mM Glc      | 5 mM Glc  | 0 mM Glc    | 5 mM Glc  |
| 24       | 0               | 1 (23±1) <sup>a</sup>    | 1 (37±3)      | 1 (31±2)      | 1 (66±4)  | 1 (26±1)    | 1 (28±4)  |
|          | 10 <sup>2</sup> | 22±1                     | 155±11        | 87±5          | 63±5      | 4.1±0.1     | 4±1       |
|          | 10 <sup>3</sup> | 33±1                     | 164±11        | 134±7         | 94±6      | 9.7±0.3     | 16±4      |
|          | 10 <sup>4</sup> | 41±1                     | <b>239±16</b> | 133±7         | 97±7      | 49±15       | 131±38    |
| 48       | 0               | 1 (76±46)                | 1 (63±3)      | 1 (13±4)      | 1 (66±13) | 1 (29±11)   | 1 (46±5)  |
|          | 10 <sup>2</sup> | 11±7                     | 146±8         | 97±30         | 32±6      | 3±1         | 2.3±0.3   |
|          | 10 <sup>3</sup> | 16±10                    | 164±9         | 169±52        | 65±13     | 5±2         | 7±1       |
|          | 10 <sup>4</sup> | 21±13                    | 143±8         | <b>290±93</b> | 94±20     | 35±19       | 50±13     |
| 72       | 0               | 1 (44±14)                | 1 (70±4)      | 1 (9±8)       | 1 (40±19) | 1 (17±16)   | 1 (15±13) |
|          | 10 <sup>2</sup> | 25±8                     | 135±8         | 85±84         | 28±13     | 4±4         | 2±2       |
|          | 10 <sup>3</sup> | 36±11                    | 160±10        | 152±150       | 56±26     | 9±8         | 10±9      |
|          | 10 <sup>4</sup> | 47±14                    | 161±15        | 255±254       | 81±38     | 35±36       | 82±72     |

<sup>a</sup>, At an aTc concentration of 0 ng/mL, the value in parentheses is the experimental mean ± s.e.m. of EYFP emission per cell after subtracting the auto-fluorescence of *Synechocystis* cells containing pPMQAK1 vector only. This value is as the denominator to calculate the induction fold when the aTc concentration is 10<sup>2</sup>, 10<sup>3</sup>, or 10<sup>4</sup> ng/mL in the respective growth condition. The induction fold is presented as mean ± s.e.m.; maximal experimental induction fold in bold. The measurement was done using a flow cytometer to collect 50,000 events for each of the three biological repeats.

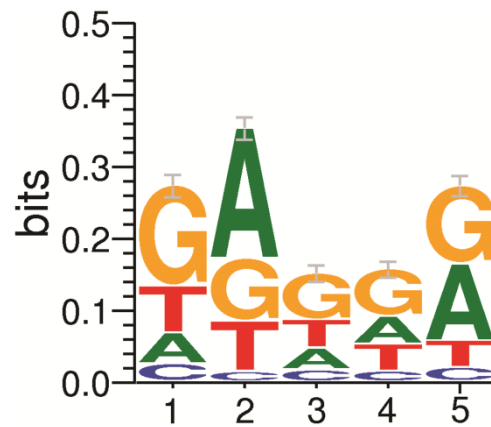

**Supplementary Figure S1** The weighted sequence logo of the -10 element downstream sequence of a type I promoters in *Synechocystis* PCC 6803 (*Synechocystis*). The non-template strand sequences between the TSS and the -10 element of a type I promoters of *Synechocystis* were accessed and weighted with the respective “sequence reads”, resulting in a sequence pool, according to the Dataset S1, Table S3 in the work of Mitschke J, *et al.* [25]. The sequence conservation in the region of 5 nt immediately downstream of the -10 element was evaluated together with this sequence pool in bits of information using Weblogo 3.0.

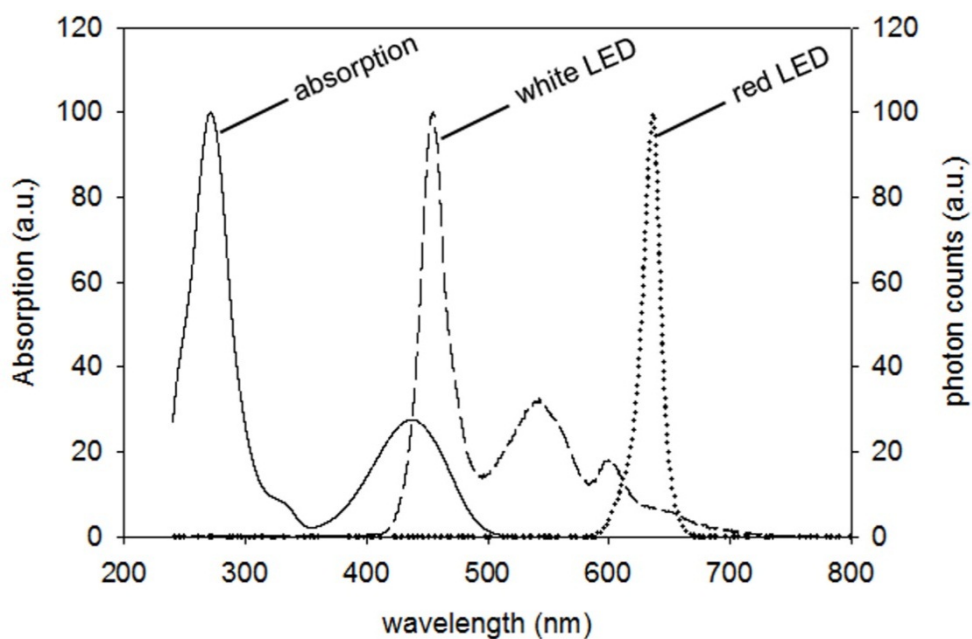

**Supplementary Figure S2** The absorption spectrum (solid line) of anhydrotetracycline (aTc) in BG11 medium supplemented with kanamycin and the spectra of photons emitted from white LED (dash line) and from red LED (dot line). The former was acquired by a Cary 5000 UV-VIS-NIR spectrophotometer (Varian) and the latter was recorded using a CCD spectrometer Avantes *AvaSpec-2048* (Azpect Photonics AB).

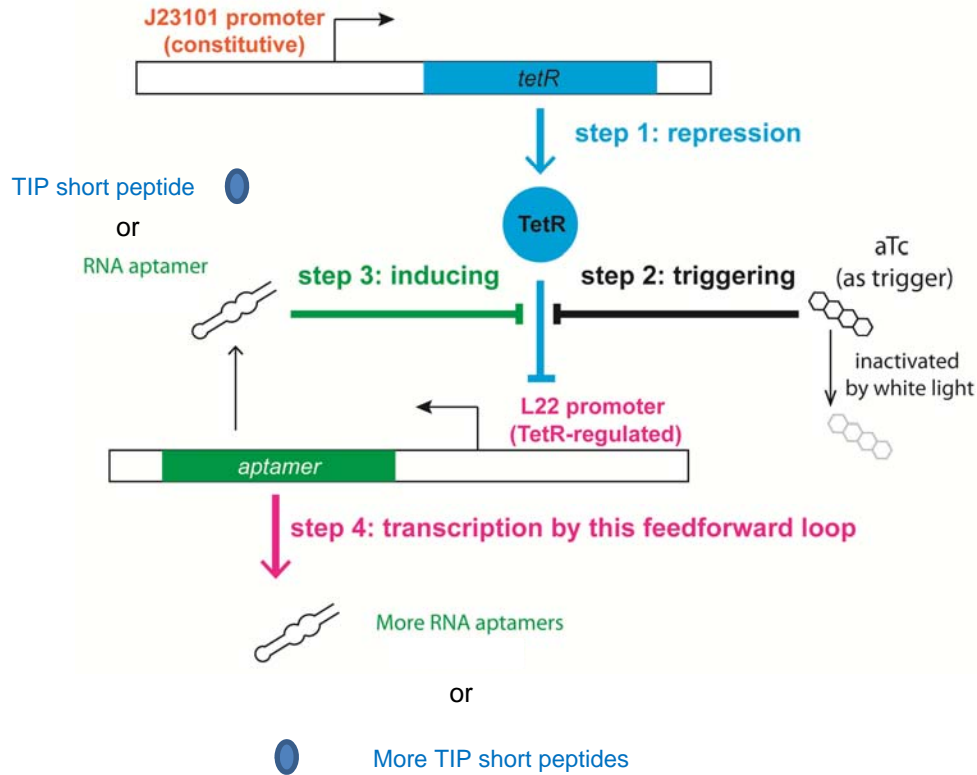

**Supplementary Figure S3** The proposed lasting induction of TetR-regulated promoters by a feed-forward loop triggered by aTc. The constitutively-expressed TetR repressors fully repress the L22 promoter (step 1). The aTc triggers the transcription of the RNA aptamer [37] or the expression of the short peptide TIP [38] (step 2). The RNA aptamer or the short peptide TIP auto-induces its transcription (step 3). More RNA aptamers or short peptides are transcribed in this feed-forward loop for inducing other TetR-regulated promoters (step 4).
